# Supplementary material for: Anoikis regulator GLI2 promotes NC cell immunity escape by TGF-β-mediated non-classic hedgehog signaling in colorectal cancer: based on artificial intelligence and big data analysis
Source: publisher site journal article supplement (doi:10.18632/aging.205283), 2023-12-29
Supplement: Supplementary file [file aging-v15i24-205283-supplementary-material-SD1.pdf]

## SUPPLEMENTARY TABLE

Supplementary Table 1. The markers of immune cell.

| TEX     | BEX       | NEX      |
|---------|-----------|----------|
| TIGIT   | PDCD1     | TIGIT    |
| LAG3    | FCRL4     | LAG3     |
| HAVCR2  | SIGLEC6   | HAVCR2   |
| PDCD1   | LAIR1     | PDCD1    |
| BTLA    | FCGR2B    | KLRC1    |
| CD160   | CD38      | FCGR3A   |
| CD244   | CD70      | CD96     |
| CTLA4   | CD72      | KLRK1    |
| IFNA1   | CD86      | NCR3     |
| INFB    | FAS       | NCR2     |
| IL2     | ITGAX     | NCR1     |
| GZMA    | CXCR3     | DNAM1    |
| TNF     | CXCR4     | FCGR3B   |
| PRF1    | CXCR5     | ITGA2    |
| GZMB    | TNFRSF13C | LAMP1    |
| IFNA1   | CCR6      | IFNG     |
| IFNA2   | CCR7      | TNF      |
| IFNA4   | CR2       | PRF1     |
| IFNA5   | CD22      | GZMA     |
| IFNA6   | PMP22     | KIR2DL1  |
| IFNA7   | SELL      | KIR2DL2  |
| IFNA8   | LILR1     | KIR2DL3  |
| IFNA10  | LILR3     | KIR2DL4  |
| IFNA11P | LILR4     | KIR2DP1  |
| IFNA12P | LILR5     | KIR2DS4  |
| IFNA13  | LILR6     | KIR2DS6  |
| IFNA14  | LILRB1    | KIR3DL0  |
| IFNA16  | LILRB2    | KIR3DL1  |
| IFNA17  | LILRB3    | KIR3DL2  |
|         | LILRB4    | KIR3DL3  |
|         | LILRB5    | KIR3DL7  |
|         | LILRB6    | KIR3DP1  |
|         | LILRB7    | KIR3DX1  |
|         |           | KIR3DS2P |
|         |           | GZMB     |
